# Supplementary material
Source: MDPI journal article supplement (https://www.mdpi.com/1996-1073/15/19/7239)
Supplement: s1 [file s1]

*Supplementary Material*

# **A Life-Cycle Approach to Investigate the Potential of Novel Biobased Construction Materials toward a Circular Built Environment**

**Naomi Keena <sup>1,2,\*</sup>, Marco Raugei <sup>3,4</sup>, Mae-ling Lokko <sup>2</sup>, Mohamed Aly Etman <sup>2</sup>, Vicki Achnani <sup>2</sup>, Barbara K. Reck <sup>5</sup> and Anna Dyson <sup>2</sup>**

<sup>1</sup> Peter Guo-hua Fu School of Architecture, Faculty of Engineering, McGill University, Montreal, QC H3A 0C2, Canada

<sup>2</sup> Yale Center for Ecosystems in Architecture (Yale CEA), Yale School of Architecture, New Haven, CT 06511, USA

<sup>3</sup> School of Engineering, Computing and Mathematics, Oxford Brookes University, Wheatley, Oxford OX33 1HX, UK

<sup>4</sup> Center for Life Cycle Assessment, Columbia University, New York, NY 10027, USA

<sup>5</sup> Center for Industrial Ecology, Yale School of the Environment, New Haven, CT 06511, USA

\* Correspondence: naomi.keena@mcgill.ca

**Supplementary Material contains:**

**Complete Bills of Materials (BOMs) for four considered wall assemblies (Table S1 - S4)\_**

**R-value calculations for four considered wall assemblies (Tables S5 – S8)**

**Table S1. Bill of Materials information for Traditional Timber Frame Wall Assembly**

| Item Name                            | Material              | Density<br>(kg/m3) | Thickness<br>(m) | Area<br>(m2) | Volume<br>(m3) | Mass<br>(kg) |
|--------------------------------------|-----------------------|--------------------|------------------|--------------|----------------|--------------|
| Timber Siding Boards                 | Western Red Cedar     | 370.000            | 0.020            | 1.000        | 0.020          | 7.400        |
| Wood battens ( 25mm x 38mm)*         | Sawn Softwood         | 510.000            | 0.038            | 0.025        | 0.001          | 0.485        |
| Continuous Foam Insulation*          | Rockwool              | 160.000            | 0.050            | 1.000        | 0.050          | 8.000        |
| OSB*                                 | Engineered wood panel | 680.000            | 0.019            | 1.000        | 0.019          | 12.920       |
| Timber studs (2x4" or 89mm x 38mm) * | Sawn Softwood         | 510.000            | 0.038            | 0.025        | 0.001          | 0.485        |
| Insulation*                          | Rockwool              | 160.000            | 0.050            | 1.000        | 0.050          | 8.000        |
| Dry Wall                             | Gypsum board          | 600.000            | 0.013            | 1.000        | 0.013          | 7.800        |

\* Potential for re-use at EoL

**Table S2. Bill of Materials information for CLT Wall Assembly**

| Item Name                                | Material                                                   | Density<br>(kg/m3) | Thickness<br>(m) | Area<br>(m2) | Volume<br>(m3) | Mass<br>(kg) |
|------------------------------------------|------------------------------------------------------------|--------------------|------------------|--------------|----------------|--------------|
| Siding                                   | Western Red Cedar                                          | 370.000            | 0.020            | 1.000        | 0.020          | 7.400        |
| Timber battens<br>(25mm x 38mm)*         | Sawn Softwood                                              | 510.000            | 0.038            | 0.025        | 0.001          | 0.485        |
| Vapor control &<br>airtight membrane     | High Density Polyethylene<br>Plastic (HDPE)                | 925.000            | 0.001            | 1.000        | 0.001          | 0.463        |
| Plywood<br>Sheathing*                    | Southern Yellow Pine Ply                                   | 650.000            | 0.010            | 1.000        | 0.010          | 6.500        |
| Interior finish +<br>insulation (solid)* | Solid Wood CLT Black Spruce<br>panel+wood fiber insulation | 500.000            | 0.055            | 1.000        | 0.055          | 27.500       |
| Insulation*                              | wood fiber insulation                                      | 160                | 0.100            | 1.000        | 0.100          | 16.000       |

\* Potential for re-use at EoL

**Table S3. Bill of Materials information for Bamboo Wall Assembly**

| Item Name                                  | Material                                 | Density<br>(kg/m3) | Thickne<br>ss (m) | Area<br>(m2) | Volume<br>(m3) | Mass<br>(kg) |
|--------------------------------------------|------------------------------------------|--------------------|-------------------|--------------|----------------|--------------|
| Bamboo Siding Board                        | Bamboo siding                            | 1150               | 0.018             | 1.000        | 0.018          | 20.7         |
| Split Bamboo Batten ( 25mm x 38mm)*        | Split Bamboo batten                      | 1100               | 0.038             | 0.025        | 0.001          | 1.0          |
| Vapor control & airtight membrane          | High Density Polyethylene Plastic (HDPE) | 925                | 0.001             | 1.000        | 0.001          | 0.5          |
| Bamboo laminated Panel*                    | Compressed Bamboo panel                  | 700                | 0.020             | 1.000        | 0.020          | 14.0         |
| Laminate Bamboo beam(2x4" or 89mm x 38mm)* | Compressed Split Bamboo beams            | 1050               | 0.038             | 0.178        | 0.007          | 7.1          |
| Insulation*                                | Loose cellulose fiber insulation         | 160                | 0.050             | 1.000        | 0.050          | 8.0          |
| Bamboo laminated Panel*                    | Compressed Bamboo panel                  | 700                | 0.020             | 1.000        | 0.020          | 14.0         |

\* Potential for re-use at EoL

**Table S4. Bill of Materials information for Coconut Wall Assembly**

| Item Name                                     | Material                                 | Density<br>(kg/m3) | Thickne<br>ss (m) | Area<br>(m2) | Volume<br>(m3) | Mass<br>(kg) |
|-----------------------------------------------|------------------------------------------|--------------------|-------------------|--------------|----------------|--------------|
| Raffia Stem panels                            | Raffia stems                             | 750                | 0.020             | 1.000        | 0.020          | 15.000       |
| Coconut Fiber bundle / Thatch proxy           | Coconut fiber                            | 900                | 0.025             | 1.000        | 0.025          | 22.500       |
| Split Bamboo Batten ( 25mm x 38mm)*           | Bamboo Split                             | 1100               | 0.038             | 0.025        | 0.001          | 1.100        |
| Vapor control & airtight membrane             | High Density Polyethylene Plastic (HDPE) | 925                | 0.001             | 1.000        | 0.001          | 0.463        |
| Plywood Sheathing*                            | Southern Yellow Pine Ply                 | 650                | 0.010             | 1.000        | 0.010          | 6.500        |
| Bamboo Laminate plates (2x4" or 89mm x 38mm)* | High Density Split bamboo laminate beam  | 1050               | 0.038             | 0.178        | 0.007          | 7.102        |
| Insulation                                    | Loose coconut mat fiber insulation       | 160                | 0.050             | 1.000        | 0.050          | 8.000        |
| Interior finish*                              | Coconut coir compressed boards           | 1300               | 0.005             | 1.000        | 0.005          | 6.500        |

\* Potential for re-use at EoL

**Table S5. R-Value Calculation Traditional Timber Frame Wall Assembly**

| Item Name                             | Material              | Layer Thickness (m) | Conductivity (W/m.K) | Resistance (m².K/ W) |
|---------------------------------------|-----------------------|---------------------|----------------------|----------------------|
| Outside Thermal Resistance            |                       |                     |                      | 0.04                 |
| Timber Siding Boards                  | Western Red Cedar     | 0.020               | 0.130                | 0.15                 |
| Wood battens (25mm x 38mm)            | Sawn Softwood         | 0.038               | 0.14                 | 0.27                 |
| Continuous Foam Insulation            | Rockwool              | 0.050               | 0.034                | 1.47                 |
| OSB                                   | Engineered wood panel | 0.019               | 0.13                 | 0.15                 |
| Timber studs (2x4" or 89mm x 38mm)    | Sawn Softwood         | 0.038               | 0.14                 | 0.27                 |
| Insulation                            | Rockwool              | 0.050               | 0.034                | 1.47                 |
| Dry Wall                              | Gypsum board          | 0.013               | 0.17                 | 0.08                 |
| Inside Thermal Resistance             |                       |                     |                      | 0.13                 |
| <b>Total thermal resistance (RSI)</b> |                       |                     |                      | <b>4.03</b>          |
| <b>R-value</b>                        |                       |                     |                      | <b>23</b>            |

**Table S6. R-Value Calculation CLT Wall Assembly**

| Item Name                             | Material                                 | Layer Thickness (m) | Conductivity (W/m.K) | Resistance (m².K/ W) |
|---------------------------------------|------------------------------------------|---------------------|----------------------|----------------------|
| Outside Thermal Resistance            |                                          |                     |                      | 0.04                 |
| Siding Boards                         | Western Red Cedar                        | 0.020               | 0.130                | 0.15                 |
| Wood battens (25mm x 38mm)            | Sawn Softwood                            | 0.038               | 0.14                 | 0.27                 |
| Vapor control & airtight membrane     | High Density Polyethylene Plastic (HDPE) | 0.001               | 0.17                 | 0.003                |
| Plywood Sheathing                     | Southern Yellow Pine Ply                 | 0.010               | 0.16                 | 0.063                |
| Wood fiber insulation (x2)            |                                          | 0.100               | 0.035                | 2.86                 |
| Interior finish                       | Solid Wood CLT Black Spruce panel        | 0.055               | 0.12                 | 0.458                |
| Dry Wall                              | Gypsum board                             | 0.013               | 0.17                 | 0.08                 |
| Inside Thermal Resistance             |                                          |                     |                      | 0.13                 |
| <b>Total thermal resistance (RSI)</b> |                                          |                     |                      | <b>4.00</b>          |
| <b>R-value</b>                        |                                          |                     |                      | <b>23</b>            |

**Table S7. R-Value Calculation Bamboo Wall Assembly**

| Item Name                                  | Material                                   | Layer Thickness (m) | Conductivity (W/m.K) | Resistance (m <sup>2</sup> .K/ W) |
|--------------------------------------------|--------------------------------------------|---------------------|----------------------|-----------------------------------|
| Outside Thermal Resistance                 |                                            |                     |                      | 0.04                              |
| Siding Boards                              | Bamboo                                     | 0.018               | 0.125                | 0.14                              |
| Split battens (25mm x 38mm)                | Bamboo                                     | 0.038               | 0.14                 | 0.27                              |
| Vapor control & airtight membrane          | High Density Polyethylene Plastic (HDPE)   | 0.001               | 0.17                 | 0.003                             |
| Bamboo laminated panel                     | Compressed Bamboo                          | 0.020               | 0.125                | 0.16                              |
| Laminate Bamboo beam (2x4" or 89mm x 38mm) | Compressed Split Bamboo beams Spruce panel | 0.038               | 0.14                 | 0.27                              |
| Insulation                                 | Loose cellulose fiber insulation           | 0.050               | 0.038                | 1.32                              |
| Bamboo laminated panel                     | Compressed Bamboo                          | 0.020               | 0.125                | 0.16                              |
| Inside Thermal Resistance                  |                                            |                     |                      | 0.13                              |
| <b>Total thermal resistance (RSI)</b>      |                                            |                     |                      | <b>2.5</b>                        |
| <b>R-value</b>                             |                                            |                     |                      | <b>14</b>                         |



**Table S8. R-Value Calculation Coconut Wall Assembly**

| Item Name                                    | Material                                 | Layer Thickness (m) | Conductivity (W/m.K) | Resistance (m².K/ W) |
|----------------------------------------------|------------------------------------------|---------------------|----------------------|----------------------|
| Outside Thermal Resistance                   |                                          |                     |                      | 0.04                 |
| Coconut Fiber bundle (Thatch)                | Coconut fiber                            | 0.025               | 0.04                 | 0.63                 |
| Split battens (25mm x 38mm)                  | Bamboo                                   | 0.038               | 0.14                 | 0.27                 |
| Vapor control & airtight membrane            | High Density Polyethylene Plastic (HDPE) | 0.001               | 0.17                 | 0.003                |
| Plywood Sheathing                            | Southern Yellow Pine Ply                 | 0.010               | 0.13                 | 0.08                 |
| Bamboo Laminate plates (2x4" or 89mm x 38mm) | High Density Split bamboo laminate beam  | 0.038               | 0.14                 | 0.27                 |
| Insulation                                   | Loose coconut mat fiber insulation       | 0.050               | 0.04                 | 1.25                 |
| Interior finish                              | Coconut coir compressed boards           | 0.005               | 0.36                 | 0.01                 |
| Inside Thermal Resistance                    |                                          |                     |                      | 0.13                 |
| <b>Total thermal resistance (RSI)</b>        |                                          |                     |                      | <b>2.7</b>           |
| <b>R-value</b>                               |                                          |                     |                      | <b>15</b>            |
